# Supplementary material for: Rational Design of High-Performance Hemithioindigo-Based Photoswitchable AIE Photosensitizer and Enabling Reversible Control Singlet Oxygen Generation
Source: MDPI journal article supplement (doi:10.3390/bios13030324), 2023-02-27
Supplement: s1 [file s1]

# **Rational design of high-performance hemithioindigo-based photoswitchable AIE photosensitizer and enabling reversible control singlet oxygen generation**

Junjie Wang <sup>1</sup>, Jianshuang Wei <sup>1</sup>, Yuehong Leng <sup>1</sup>, Yanfeng Dai <sup>2</sup>, Changqiang Xie <sup>2</sup>, Zhihong Zhang <sup>1,2</sup>, Mingqiang Zhu <sup>2,3,\*</sup>, and Xingzhou Peng <sup>2,\*</sup>

<sup>1</sup> Britton Chance Center and MoE Key Laboratory for Biomedical Photonics, Wuhan National Laboratory for Optoelectronics-Huazhong University of Science and Technology, Wuhan, Hubei 430074, China

<sup>2</sup> Key Laboratory of Biomedical Engineering of Hainan Province, School of Biomedical Engineering, Hainan University, Haikou, Hainan 570228, China

<sup>3</sup> Wuhan National Laboratory for Optoelectronics, School of Optical and Electronic Information, Huazhong University of Science and Technology, Wuhan, Hubei 430074, China

\*Correspondence: Xingzhou Peng (pengxzh@hainanu.edu.cn)

Mingqiang Zhu (mqzhu@hust.edu.cn)

Address: Room 205, School of Biomedical Engineering, Hainan University, Haikou, Hainan 570228, China.

Xingzhou Peng (pengxzh@hainanu.edu.cn) is the corresponding author to communicate with the Editorial and Production offices.

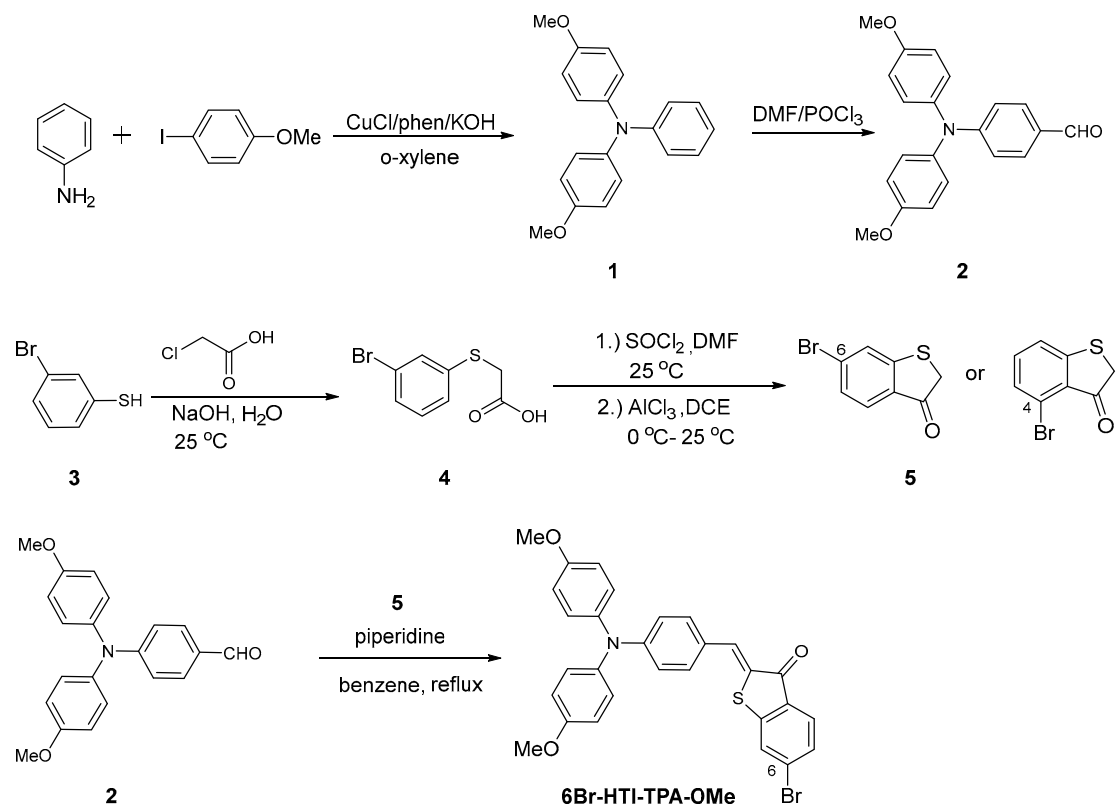

Scheme S1. Synthetic route of 6Br-HTI-TPA-OMe.

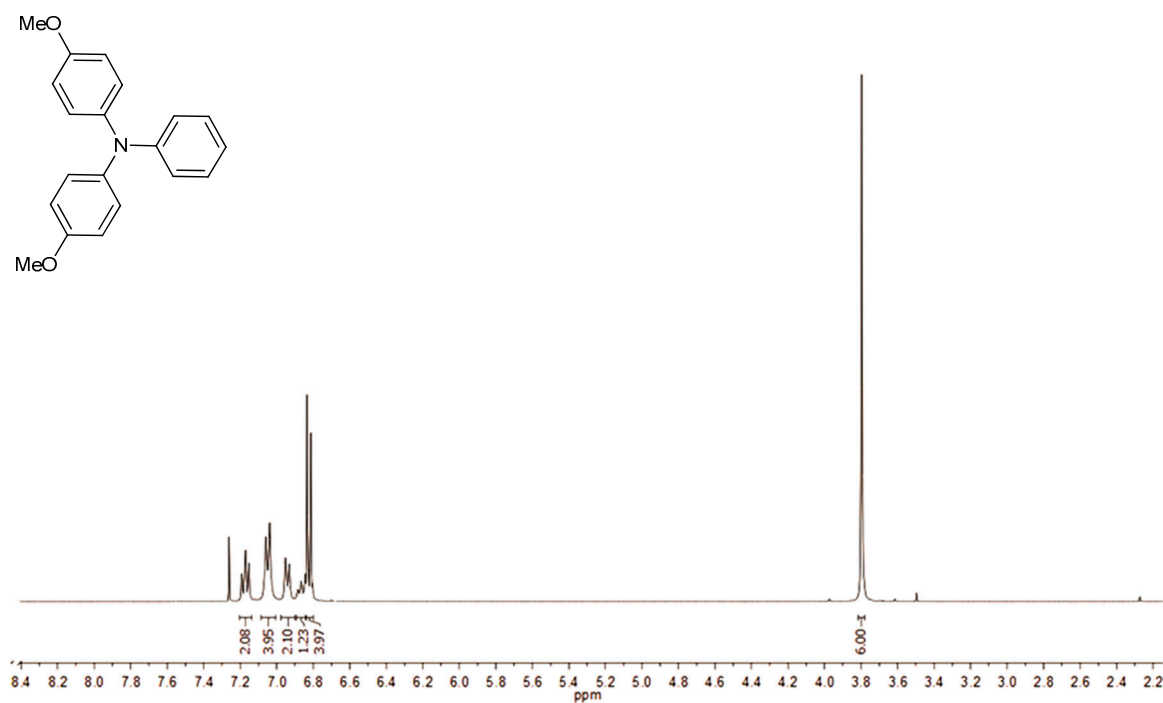

Figure S1.  $^1\text{H}$  NMR spectra of *N,N'*-di(4-methoxyphenyl)phenylamine **1** in  $\text{CDCl}_3$  (400 MHz).

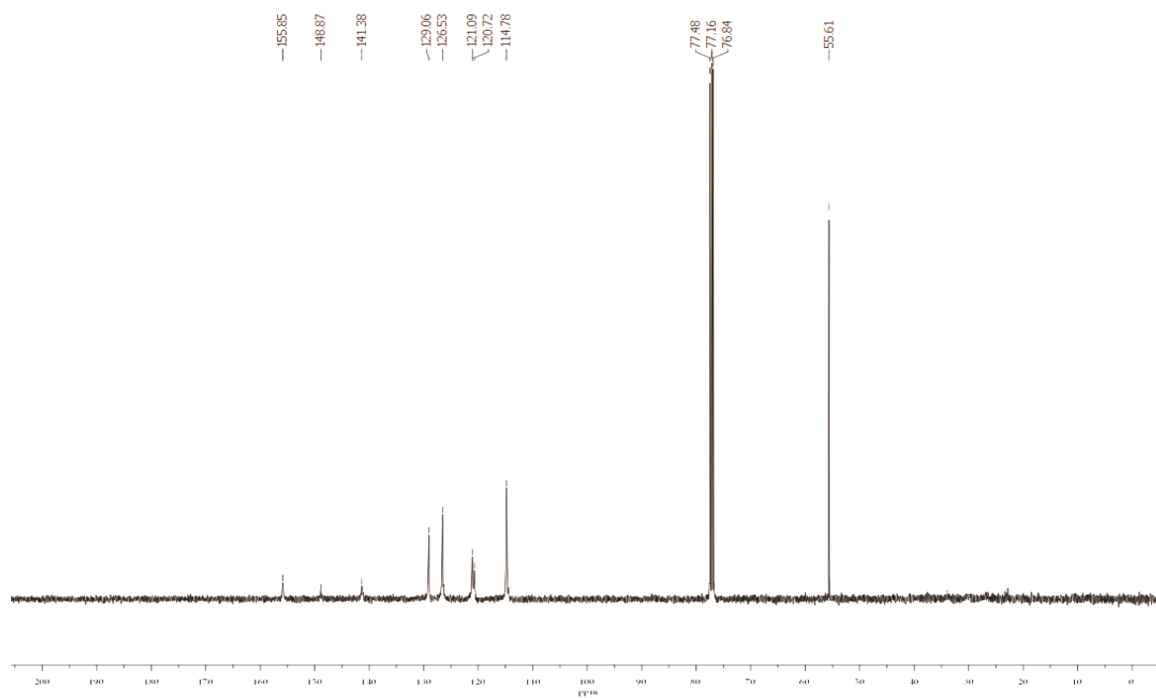

Figure S2. <sup>13</sup>C NMR spectra of *N,N'*-di(4-methoxyphenyl)phenylamine **1** in CDCl<sub>3</sub> (101 MHz).

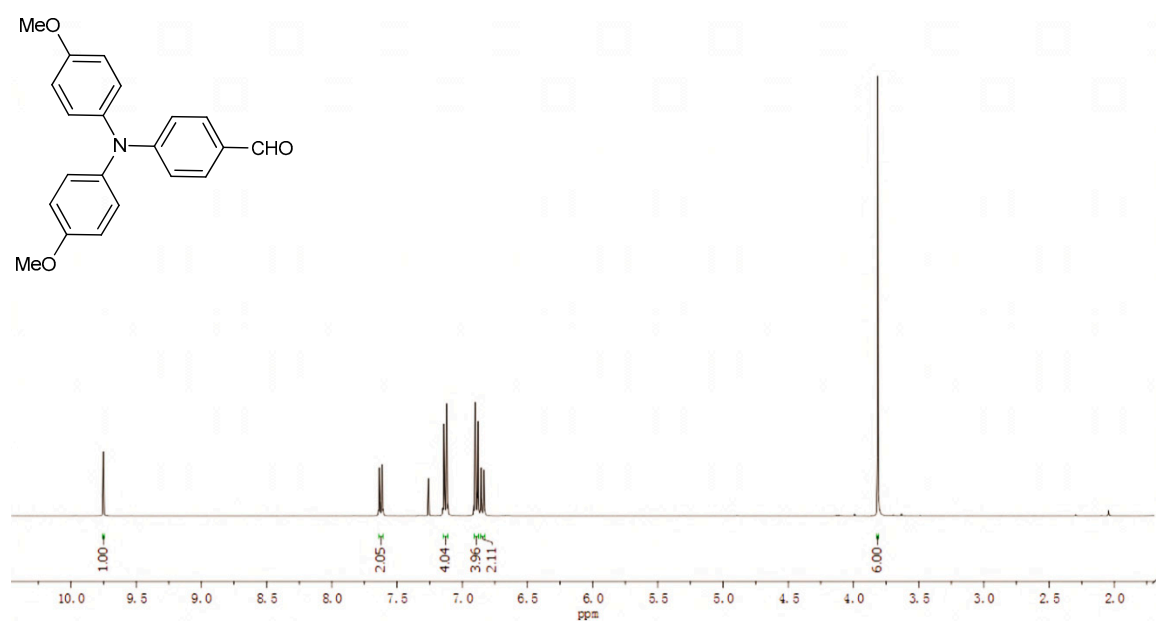

Figure S3. <sup>1</sup>H NMR spectra of *N,N'*-bis(4-methoxyphenyl)aminobenzaldehyde **2** in CDCl<sub>3</sub> (400 MHz).

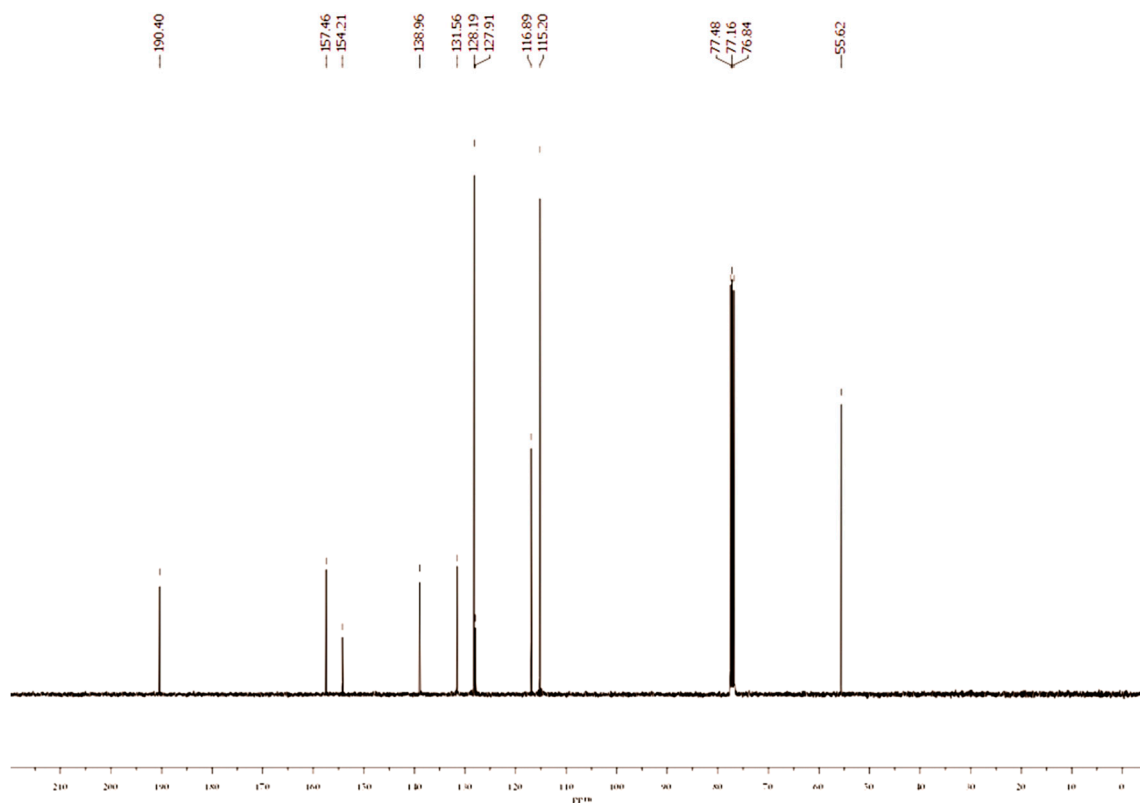

Figure S4. <sup>13</sup>C NMR spectra of *N,N'*-bis(4-methoxyphenyl)aminobenzaldehyde **2** in CDCl<sub>3</sub> (101 MHz).

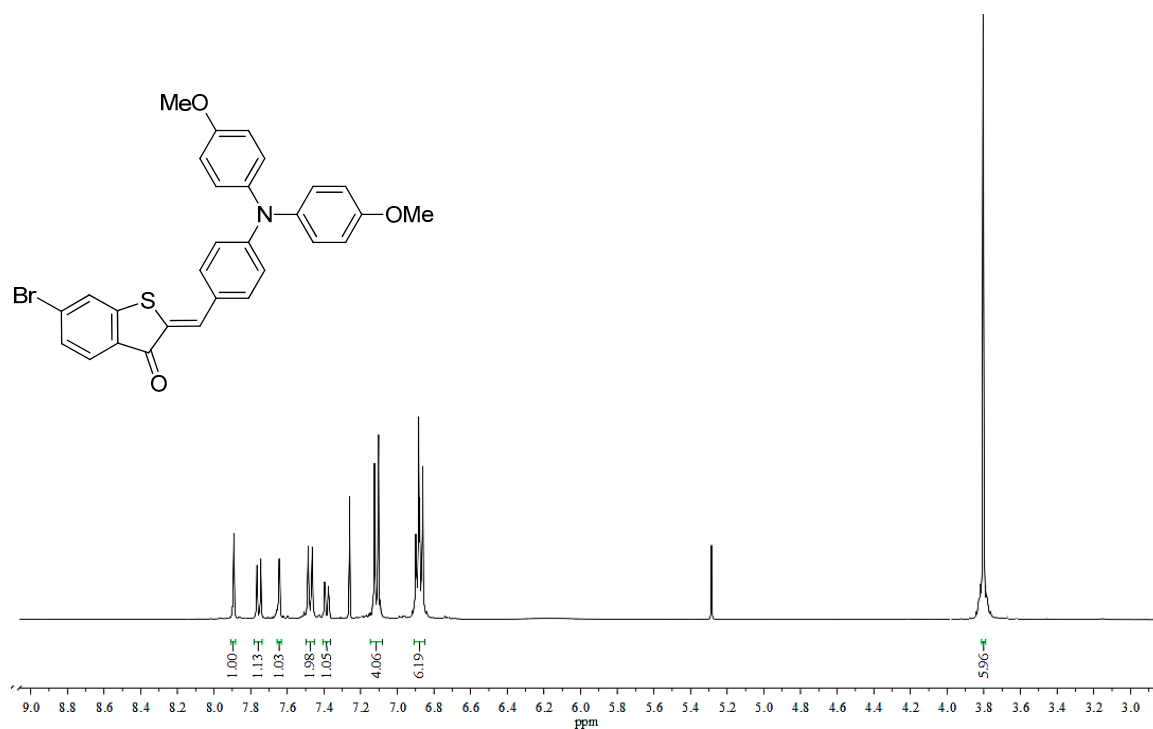

Figure S5. <sup>1</sup>H NMR spectra of 6Br-HTI-TPA-OMe in CDCl<sub>3</sub> (500 MHz).

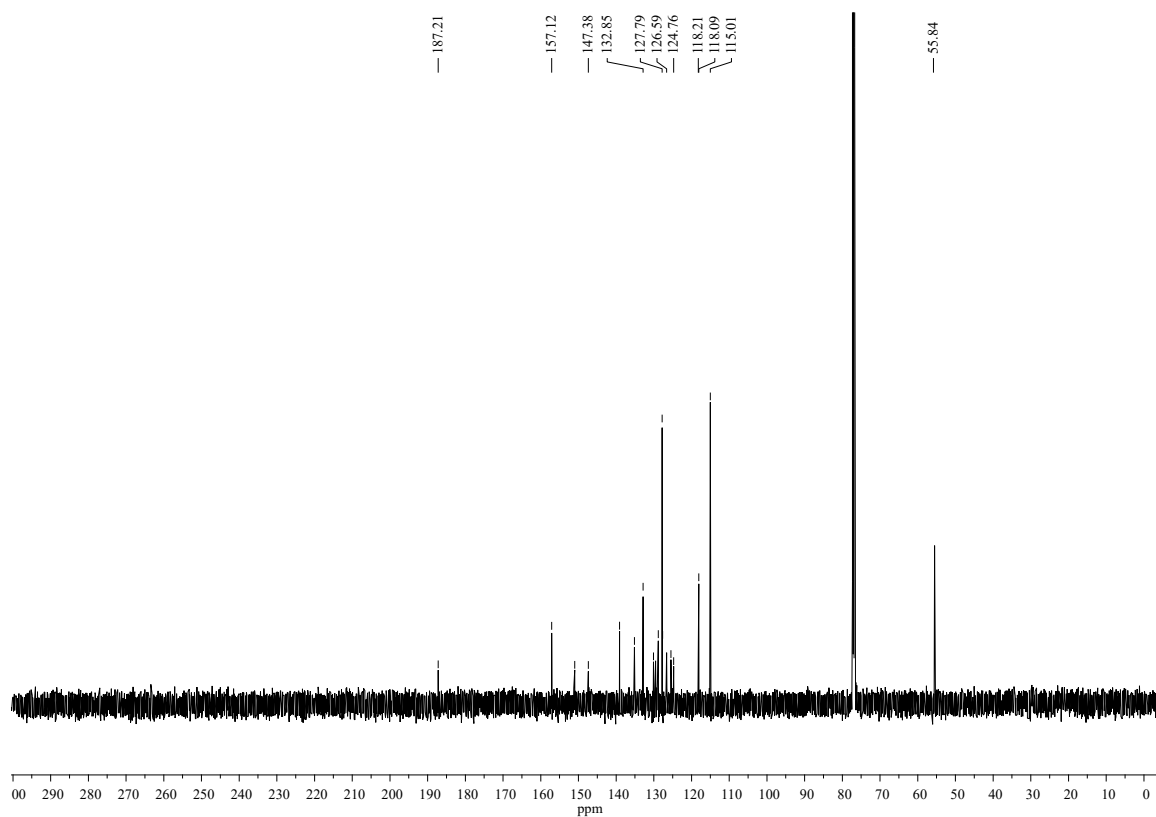

Figure S6. <sup>13</sup>C NMR spectra of 6Br-HTI-TPA-OMe in CDCl<sub>3</sub> (126 MHz).

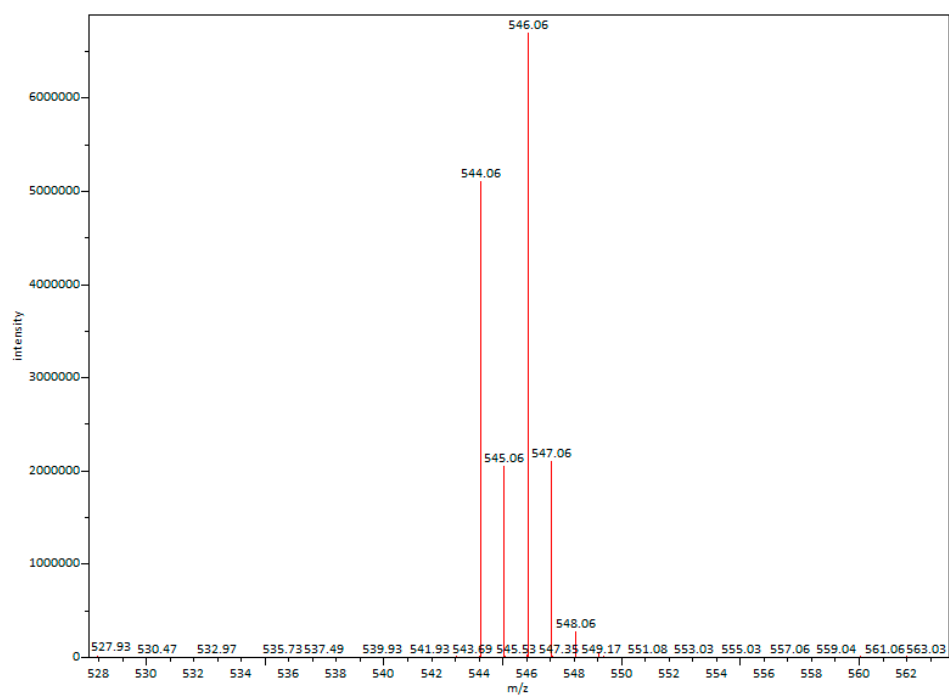

Figure S7. MS spectra of 6Br-HTI-TPA-OMe.

Table S1. UV-vis absorption ( $\lambda_{abs}$ ) and fluorescence ( $\lambda_f$ ) maxima, quantum yields of fluorescence ( $\Phi_f$ ), Stokes shifts ( $\Delta\nu_{st}$ ) for the Z form of 6Br-HTI-TPA-OMe in different solvents.

| solvent            | $\lambda_{abs}$ (nm) | $\lambda_f$ (nm) | $\Phi_f$ (%) | $\Delta\nu_{st}$ (nm) <sup>[c]</sup> |
|--------------------|----------------------|------------------|--------------|--------------------------------------|
| hexane             | 488                  | 534              | 2.8          | 46                                   |
| PCE <sup>[a]</sup> | 500                  | 595              | -            | 95                                   |
| DCM <sup>[b]</sup> | 501                  | 608, 713         | 0.06         | 107, 212                             |
| MeCN               | 492                  | 621, 725         | 0.01         | 129, 233                             |

[a] perchloroethylene. [b] dichloromethane. [c] the Stokes shift was calculated from the peak of fluorescence and the absorption maximum.

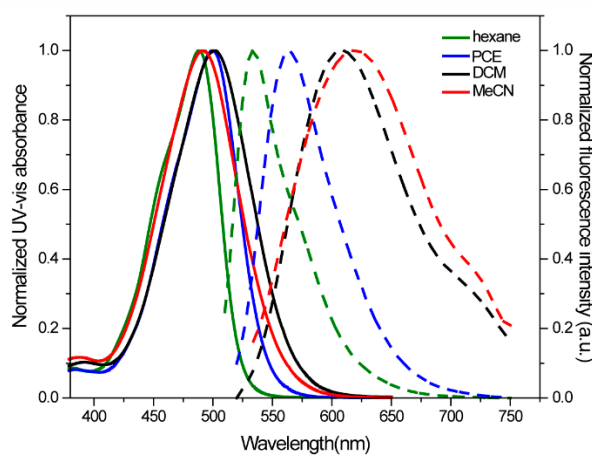

Figure S8. Normalized UV-vis absorption (solid line) and fluorescence (dashed line) spectra of 6Br-HTI-TPA-OMe in different solvents.

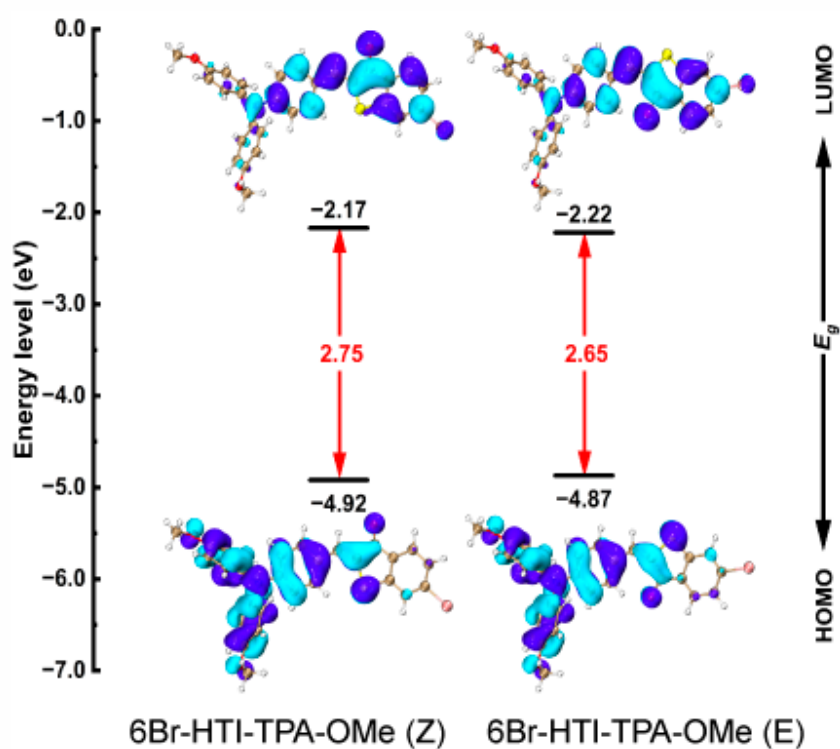

Figure S9. The calculated HOMOs and LUMOs of Z form and E form for 6Br-HTI-TPA-OMe.

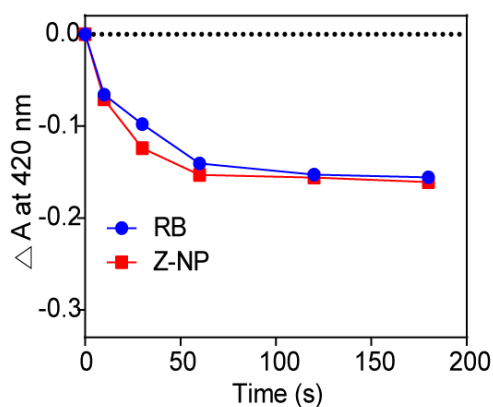

Figure S10. The absorption spectrum of DPBF (30  $\mu\text{M}$ ) with Z-NPs (10  $\mu\text{M}$ ) or RB (10  $\mu\text{M}$ ) in water at different irradiations.

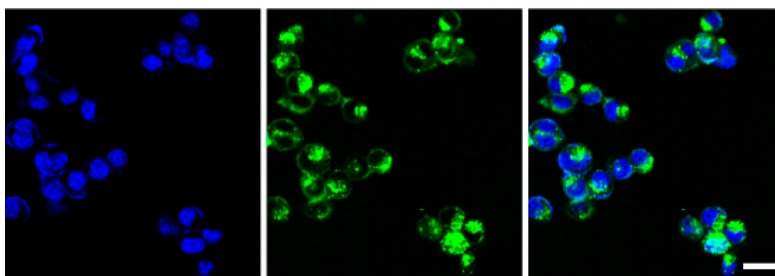

Figure S11. Confocal images of cellular uptake of Z-NPs (5  $\mu\text{M}$ ) by 4T1 cells *in vitro* after incubation of 4 h. Blue: nucleus, green: Z-NPs.

## EXPERIMENTAL PROCEDURES

### Instruments and measurements

Flash-column chromatography was performed using silica gel (60 Å, Sinopharm Chemical Reagent Co. Ltd., China).  $^1\text{H}$ ,  $^{13}\text{C}$  NMR spectra were recorded with a Bruker Avance II (400 MHz) in  $\text{CDCl}_3$  with tetramethylsilane (TMS) as reference at 298 K. Chemical shifts were reported in parts per million (ppm) and were referenced to the residual solvent resonance as the internal standard ( $\text{CDCl}_3$ :  $\delta = 7.26$  ppm for  $^1\text{H}$  NMR and  $\text{CDCl}_3$ :  $\delta = 77.16$  ppm for  $^{13}\text{C}$  NMR). High-resolution mass spectra (HRMS) were performed on LTQ Orbitrap XL apparatus. All the UV/vis spectra were measured on Shimadzu UV-1601 UV-Visible spectrometer. The fluorescence spectra were obtained

on Hitachi F-4500 fluorescence spectrophotometer. All LED light reached the sample after being focused by a collected lens (5 cm, Thorlabs, COP1-A, Olympus) in the dark room. The light source included 520 nm LED source (3W, 40 mW/cm<sup>2</sup>, Shenzhen boya technology), 480 nm LED source (3W, 33 mW/cm<sup>2</sup>, Shenzhen boya technology), 580 nm LED source (3W, 54 mW/cm<sup>2</sup>, Shenzhen boya technology). In which, the 480 nm LED was used for the Z-to-E isomerization, the 580 nm LED was used for the E-to-Z isomerization. The average hydrodynamic diameter and Zeta potential were measured with Nalvern Nano-ZS90. The data of MTS experiment was measured with Bio-Tek Epoch microplate reader. The confocal imaging experiments were subjected to Andor BC43 (Oxford, USA). The flow cytometry experiments were carried out with Cytoflex S cytometer (Beckman coulter, USA). The ground state (S0) optimized geometry was obtained using B3LYP/6-31G\*\*. The exciton energies of the first singlet (S1) and first triplet states (T1) were obtained on the corresponding optimized ground state structure using TD-B3LYP/6-31G\*\*.

### **Synthesis of N,N'-di(4-methoxyphenyl)amine**

A mixture of 4-methoxyiodobenzene (11.23 g, 48.0 mmol, 2.4 equiv.), aniline (1.86 g, 20.0 mmol, 1.0 equiv.), 1,10-phenanthroline (0.793 g, 4.0 mmol, 0.2 equiv.), CuCl (0.396 g, 4.0 mmol, 0.2 equiv.), KOH (9.28 g, 160.0 mmol, 8.0 equiv.) was dissolved in 50 mL o-xylene and stirred at 160 °C for 12 h. After filtering the solid, the mixture was then extracted with CH<sub>2</sub>Cl<sub>2</sub> (25 mL × 3), washed with water (25 mL × 3), the organic layer was decolorized with active carbon for 1 h, then filtered over a pad of Celite and the solvent removed by rotary evaporation to get an oily product. The product **1** was crystallized from methanol to afford the grey crystals (needles, 3.24 g, 53.1 %). <sup>1</sup>H NMR (400 MHz, CDCl<sub>3</sub>) δ = 7.17 (t, <sup>3</sup>J = 7.9 Hz, 2H), 7.05 (d, <sup>3</sup>J = 8.7 Hz, 4H), 6.94 (d, <sup>3</sup>J = 8.0 Hz, 2H), 6.88 (d, <sup>3</sup>J = 7.2 Hz, 1H), 6.85-6.80 (m, 4H), 3.80 (s, 6H); <sup>13</sup>C NMR (101 MHz, CDCl<sub>3</sub>) δ = 155.85, 148.87, 141.38, 129.06, 126.53, 121.09, 120.72, 114.78, 55.61.

### **Synthesis of N,N'-bis(4-methoxyphenyl)aminobenzaldehyde**



To a mixture of *N,N'*-di(4-methoxyphenyl)phenylamine **1** (1.52 g, 5.0 mmol, 1.0 equiv.) and DMF (4.38 g, 60.0 mmol, 12.0 equiv.) at 0 °C, POCl<sub>3</sub> (1.53 g, 10.0 mmol, 1.1 equiv.) was added dropwise with stirring. The reaction mixture was stirred at room temperature for 12 h. The reaction was quenched by ice/water and neutralized using NaOH solution (10 mL, 4 mol/L). The mixture was extracted with CH<sub>2</sub>Cl<sub>2</sub> (20 mL × 3), washed with water (20 mL × 3), dried over MgSO<sub>4</sub> and evaporated under reduced pressure. The purified product **2** was obtained by column chromatography using pentane/ethyl acetate (20:1, v/v) as a yellow powder (0.90 g, 54.2 %). <sup>1</sup>H NMR (400 MHz, CDCl<sub>3</sub>) δ = 9.75 (s, 1H), 7.65-7.60 (m, 2H), 7.15-7.11 (m, 4H), 6.92-6.87 (m, 4H), 6.84 (d, <sup>3</sup>J = 8.8 Hz, 2H), 3.81 (s, 6H); <sup>13</sup>C NMR (101 MHz, CDCl<sub>3</sub>) δ = 190.40, 157.46, 154.21, 139.96, 131.56, 128.19, 127.91, 116.89, 115.20, 55.62.

#### Synthesis of 2-((3-bromophenyl)thiol)acetic acid

3-Bromobenzenethiol **3** (3.78 g, 20 mmol, 1.0 equiv.) was dissolved in NaOH solution (1.60 g in 20 mL H<sub>2</sub>O) under N<sub>2</sub> atmosphere. The solution of chloroacetic acid (2.07 g, 22 mmol, 1.1 equiv.) was added drop-wise to the mixture at 0 °C. The reaction mixture was stirred at room temperature for 18 h. After complete consumption of the starting material (TLC monitoring), the mixture was acidified with HCl solution (25 mL, 6 mol/L) and precipitated. The crude product was washed with water and dried over P<sub>2</sub>O<sub>5</sub>, yielding 2-((3-bromophenyl)thiol)acetic acid **4** (white solid, 4.92 g, 92.8 %). m.p. 118.0 °C (reference reported 117 - 119 °C).

#### Synthesis of 4-/6-bromobenzo[b]thiophen-3(2H)-one

2-((3-Bromophenyl)thiol)acetic acid **4** (2.46 g, 10.0 mmol, 1.0 equiv.) was dissolved in SOCl<sub>2</sub> (27.9 g, 230.0 mmol, 23 equiv.) and a few drops of DMF were added under N<sub>2</sub>. Then the reaction mixture was stirred at room temperature for 2 h. The excess of SOCl<sub>2</sub> was removed by distillation under reduced pressure. The resulting crude acid chloride was dissolved in 20 mL DCE and the solution was cooled to 0 °C. Aluminum chloride (1.7 g, 13.0 mmol, 1.3 equiv.) was added in 2-3 portions over 5 min at 0 °C. The mixture was stirred under N<sub>2</sub> at 25 °C for 80 min. The reaction was quenched with ice/water

and extracted with CH<sub>2</sub>Cl<sub>2</sub> (20 mL × 3). The organic solution was washed with saturated sodium chloride (20 mL × 3), dried over anhydrous MgSO<sub>4</sub>, filtrated and evaporated to give the crude product, a mixture of 4-/6-bromobenzo[*b*]thiophen-3(2*H*)-one **5** (4Br : 6Br = 27 : 73). This crude product was used for the next step directly (1.49 g, 65.4 %).

### Encapsulation efficiency

The 6Br-HTI-TPA-OMe NPs were purified via high-speed centrifugation to remove residual 6Br-HTI-TPA-OMe small molecules in the supernatant. The amount of 6Br-HTI-TPA-OMe was determined as follows:

$$\text{Encapsulation efficiency (\%)} = W_t/W_i \times 100\%$$

Where  $W_i$  is the actual amount of the 6Br-HTI-TPA-OMe in the formulation, which was detected by UV-vis spectroscopy at 520 nm, and  $W_i$  is the amount of the initial amount of the 6Br-HTI-TPA-OMe added during the preparation process.

### Fluorescence quantum yield

The quantum yields of fluorescence ( $\Phi_f$ ) were obtained by a reference method with RhB ( $\Phi_f = 0.7$ , methanol) as the standard compound. The calculation of the quantum yield of the samples was based on equation (1) as followed:

$$\Phi_f = \Phi_{f(std)} \frac{F \cdot A_{std} \cdot n^2}{F_{std} \cdot A \cdot n_{std}^2}$$

Where  $F$  and  $F_{std}$  are the integrated fluorescence area of samples and standard;  $A$  and  $A_{std}$  are the absorbance of samples and standard;  $n$  and  $n_{std}$  are the refractive index of H<sub>2</sub>O and methanol, respectively.

### <sup>1</sup>O<sub>2</sub> generation

The singlet oxygen generation efficiency was to test in aqueous solution. 1,3-diphenylisobenzofuran (DPBF) was first dissolved in DMSO to give a 20 mM of solution, and then diluted with H<sub>2</sub>O to 30 μM (containing 0.15% DMSO). The DPBF solution (200 μL) was then mixed with Z-NPs or E-NPs (containing [DPBF] = 30 μM,

[NPs] = 10  $\mu$ M). The mixture was irradiated with 520 nm LED light immediately, and then DPBF degradation at 420 nm was monitored along with irradiated time.

### **Cell uptake experiment**

The uptake of 6Br-HTI-TPA-OMe NPs in the Z form by tumor cells was studied in 4T1 cells. The Z-NPs (5  $\mu$ M) and cells were co-incubated for 0.5h, 1h, 2h and 4h, respectively. The real-time imaging was performed to monitor cell uptake using an LSM 710 laser confocal scanning microscope (Zeiss, Germany, Ex: 488 nm, collection channel: 500-700 nm)

### ***In vitro* cytotoxicity assays**

For the *in vitro* photodynamic therapeutic effect and cytotoxicity of Z-NPs, the MTS assay was used to analyse the viability of 4T1 cells. Cells were seeded in 96-well plates ( $1 \times 10^4$  cells per cell) and incubated for 24 h at 37 °C under 5% CO<sub>2</sub>. Subsequently, the cells were incubated with different concentrations (0, 5, 10, 15 and 20  $\mu$ M) of Z-NPs for 4 h and irradiated with a 520 nm LED light (40 mW/cm<sup>2</sup>) for 5 min or without light. After washing with PBS three times, they were incubated at 37 °C for another 20 h. Then, 100  $\mu$ L of 10% [3-(4,5-dimethylthiazol-2-yl)-5-(3-carboxymethoxyphenyl)-2-(4-sulfophenyl)-2H-tetrazolium] (MTS) was added to each well and cultured for 2 h at 37 °C. The absorbance at 490 nm was then measured using a microplate spectrophotometer to calculate the cell survival rate.

### **Intracellular <sup>1</sup>O<sub>2</sub> detection**

The <sup>1</sup>O<sub>2</sub> indicator DCFH-DA was used to detect <sup>1</sup>O<sub>2</sub> produced by Z-NPs after irradiating with 520 nm LED light in 4T1 cells. In brief, 4T1 cells were incubated with different subsequent treatments: (1) control; (2) Z-NPs, incubated with 15  $\mu$ M Z-NPs for 6 h, then washed three times with PBS, incubated with 30  $\mu$ M DCFH-DA for 20 min; (3) LED, incubated with 30  $\mu$ M DCFH-DA for 20 min, then washed three times with PBS, and irradiated with 520 nm LED light for 5 min; (4) Z-NP+LED, incubated with 15  $\mu$ M Z-NPs for 6 h, then washed three times with PBS, incubated with 30  $\mu$ M DCFH-DA for 20 min, then washed three times with PBS, and irradiated with 520 nm LED light

for 5 min; (5) Z-NP+LED+NaN<sub>3</sub>, pre-incubated with 20 mM NaN<sub>3</sub> for 1 h, then incubated with 15  $\mu$ M Z-NPs for 6 h, then washed three times with PBS, incubated with 30  $\mu$ M DCFH-DA for 20 min, then washed three times with PBS, and irradiated with 520 nm LED light for 5 min. After these treatments, confocal fluorescence imaging was performed to detect the level of singlet oxygen (Ex: 488 nm, collection channel: 510-600 nm).

### **Apoptosis test**

FITC-Annexin V/propidium iodide (PI) Apoptosis Detection Kit (Shanghai Yesen Biotechnology Co. Ltd) was used to perform double-stain imaging of photo-induced cell death of 4T1 cells. In brief, 4T1 cells were seeded in confocal dishes and then incubated with Z-NPs (15  $\mu$ M), E-NPs (irradiated with 480 nm LED to form E-NPs, 15  $\mu$ M) for 4 h, then irradiated with or without 520 nm LED light (40 mW/cm<sup>2</sup>) for 5 min. After treatment, the cells were stained with a FITC Annexin V/PI Apoptosis Detection Kit according to the manual. The apoptosis imaging was observed by confocal microscope imaging (Ex: 488 nm for FITC, Ex: 535 nm for PI). In addition, the fluorescence intensity of the above treated cells was quantitatively analyzed by flow cytometry.

### **Statistical analysis**

Statistical analysis was performed using GraphPad Prism (GraphPad Software, Inc., La Jolla, CA, USA). For comparisons of two groups, a two-tailed unpaired *t*-test was performed. All statistical data are expressed as the mean  $\pm$  SD. Significant differences between the groups were labelled \* for  $p < 0.05$ , \*\* for  $p < 0.01$ , \*\*\* for  $p < 0.001$  and \*\*\*\* for  $p < 0.0001$ .
